# Supplementary material for: Somatic and Germline Genomic Alterations in Very Young Women with Breast Cancer
Source: PubMed Central journal article supplement — Clin Cancer Res. 2022 Jan 1;28(11):2339–48. doi: 10.1158/1078-0432.CCR-21-2572 (PMC9359721; doi:10.1158/1078-0432.ccr-21-2572), 2022-01-01
Supplement: ccr-21-2572_supplementary_table_s5_supps5.pdf [file ccr-21-2572_supplementary_table_s5_supps5.pdf]

**Supplementary Table S5:** Young women’s cohort (YWBC) vs TCGA characteristics, within luminal A and luminal B subgroups. Parameters from the TCGA cohort that were not collected or not collected in the same manner as the YWBC cohort are left blank in the TCGA column.

**Part A: Luminal A**

|                             | <b>YWBC (<math>\leq 35</math> yo)</b><br>N=28 patients | <b>TCGA (<math>\geq 45</math> yo)</b><br>N=429 patients |
|-----------------------------|--------------------------------------------------------|---------------------------------------------------------|
| <b>Parameter</b>            | <b>No. of patients (%)</b>                             | <b>No. of patients (%)</b>                              |
| Anatomic stage at diagnosis |                                                        |                                                         |
| 0 (DCIS)                    | 1 (3.6%)                                               | 0 (0%)                                                  |
| I                           | 15 (53.6%)                                             | 100 (23.3%)                                             |
| II                          | 9 (32.1%)                                              | 227 (52.9%)                                             |
| III                         | 3 (10.7%)                                              | 85 (19.8%)                                              |
| IV                          | 0 (0%)                                                 | 6 (1.4%)                                                |
| Unknown                     | 0 (0%)                                                 | 11 (2.6%)                                               |
| T stage                     |                                                        |                                                         |
| Tis                         | 1 (3.6%)                                               | 0 (0%)                                                  |
| T1                          | 19 (67.9%)                                             | 142 (33.1%)                                             |
| T2                          | 7 (25.0%)                                              | 225 (52.4%)                                             |
| T3                          | 1 (3.6%)                                               | 45 (10.5%)                                              |
| T4                          | 0 (0%)                                                 | 15 (3.5%)                                               |
| TX                          | 0 (0%)                                                 | 2 (0.5%)                                                |
| N stage                     |                                                        |                                                         |
| N0                          | 16 (57.1%)                                             | 216 (50.3%)                                             |
| N1                          | 8 (28.6%)                                              | 135 (31.5%)                                             |
| N2-3                        | 2 (7.1%)                                               | 69 (16.1%)                                              |
| NX                          | 2 (7.1%)                                               | 9 (2.1%)                                                |
| Tumor grade                 |                                                        |                                                         |
| 1                           | 5 (17.9%)                                              | Not collected                                           |
| 2                           | 19 (67.9%)                                             | Not collected                                           |
| 3                           | 4 (14.3%)                                              | Not collected                                           |
| Histology                   |                                                        |                                                         |
| Ductal                      | 20 (71.4%)                                             | 257 (59.9%)                                             |
| Lobular                     | 0 (0%)                                                 | 129 (30.1%)                                             |
| Mixed ductal and lobular    | 5 (17.9%)                                              | Not collected                                           |
| Other/unknown               | 3 (10.7%)                                              | 43 (10.0%)                                              |

**Part B: Luminal B**

|                             | <b>YWBC (<math>\leq 35</math> yo)</b><br>N=43 patients | <b>TCGA (<math>\geq 45</math> yo)</b><br>N=169 patients |
|-----------------------------|--------------------------------------------------------|---------------------------------------------------------|
| <b>Parameter</b>            | <b>No. of patients (%)</b>                             | <b>No. of patients (%)</b>                              |
| Anatomic stage at diagnosis |                                                        |                                                         |
| 0 (DCIS)                    | 1 (2.3%)                                               | 0 (0%)                                                  |
| I                           | 10 (23.3%)                                             | 19 (11.2%)                                              |
| II                          | 25 (58.1%)                                             | 93 (55.0%)                                              |
| III                         | 7 (16.3%)                                              | 50 (29.6%)                                              |
| IV                          | 0 (0%)                                                 | 4 (2.4%)                                                |
| Unknown                     | 0 (0%)                                                 | 3 (1.8%)                                                |
| T stage                     |                                                        |                                                         |
| Tis                         | 1 (2.3%)                                               | 0 (0%)                                                  |
| T1                          | 17 (39.5%)                                             | 32 (18.9%)                                              |
| T2                          | 22 (51.2%)                                             | 107 (63.3%)                                             |
| T3                          | 3 (7.0%)                                               | 20 (11.8%)                                              |
| T4                          | 0 (0%)                                                 | 10 (5.9%)                                               |
| TX                          | 0 (0%)                                                 | 0 (0.0%)                                                |
| N stage                     |                                                        |                                                         |
| N0                          | 17 (39.5%)                                             | 70 (41.4%)                                              |
| N1                          | 22 (51.2%)                                             | 56 (33.1%)                                              |
| N2-3                        | 4 (9.3%)                                               | 39 (23.1%)                                              |
| NX                          | 0 (0.0%)                                               | 4 (2.4%)                                                |
| Tumor grade                 |                                                        |                                                         |
| 1                           | 0 (0.0%)                                               | Not collected                                           |
| 2                           | 9 (20.9%)                                              | Not collected                                           |
| 3                           | 34 (79.1%)                                             | Not collected                                           |
| Histology                   |                                                        |                                                         |
| Ductal                      | 35 (81.4%)                                             | 144 (85.2%)                                             |
| Lobular                     | 2 (4.7%)                                               | 11 (6.5%)                                               |
| Mixed ductal and lobular    | 2 (4.7%)                                               | Not collected                                           |
| Other/unknown               | 4 (9.3%)                                               | 14 (8.3%)                                               |
